## Sacubitril/valsartan promotes cardiac reverse remodeling and preserves renal function in a real-world heart failure and reduced ejection fraction (HFrEF) population

Polito MV.; Rispoli A.; Vitulano V.; D'auria F.; Silverio A.; De Angelis E.; Loria F.; Citro R.; Galasso G.; Iaccarino G.; Ciccarelli M.

AOU S. Giovanni di Dio e Ruggi d'Aragona, Salerno, Italy

### Funding Acknowledgements: none

**Aims.** To evaluate the effects of Sacubitril/Valsartan (S/V) on clinical, laboratory and echocardiographic parameters and outcomes in a real-world population with heart failure with reduced ejection fraction (HFrEF).

**Methods and results.** Prospective study enrolling consecutive patients with HFrEF treated with S/V. The primary outcome was HF rehospitalization; secondary outcomes were all-cause death, cardiac death and the composite of cardiac death and HF rehospitalization at 12 months follow up. The clinical outcome was compared with a retrospective cohort of 90 HFrEF patients treated with standard medical therapy by using propensity score weighting. At 6 months follow-up, changes in symptoms, echocardiographic parameters, eGFR and furosemide dose were also evaluated. The study population consisted of 90 patients (66.1 ± 11.7 years). At 6 months FU, a significant improvement in NYHA class, LVEF (from 31.0% to 34.0%;  $p = 0.001$ ), LVESV (from 115.0 to 101.0 mL;  $p = 0.033$ ) and sPAP (from 31.0 to 25.0 mmHg;  $p = 0.024$ ) was observed. Moreover, S/V did not affect negatively eGFR and was associated with a significantly lower dose of furosemide prescribed. The propensity score weighting adjusted regression analysis showed a significantly lower risk for HF rehospitalization (HR, 0.131; 95% CI, 0.034-0.503;  $p = 0.003$ ) and the composite outcome (HR, 0.162; 95% CI, 0.053-0.492;  $p = 0.001$ ) among patients treated with S/V as compared to the standard therapy group.

**Conclusions.** In this real-world HFrEF population, S/V reduced HF rehospitalization and cardiac death at 1 year. Moreover, S/V improved significantly NYHA class, LVEF, LVESV and sPAP at 6 months, preserving renal function and reducing the need of furosemide.

### Table

| Study outcomes       | Unadjusted model |             |         |
|----------------------|------------------|-------------|---------|
|                      | HR               | 95% CI      | p-value |
| HF rehospitalization | 0.273            | 0.101-0.740 | 0.011   |
| Cardiac death        | 0.443            | 0.137-1.440 | 0.176   |
| Composite outcome    | 0.331            | 0.155-0.710 | 0.005   |
| All-cause death      | 0.666            | 0.272-1.628 | 0.372   |
|                      | Adjusted model   |             |         |
|                      | HR               | 95% CI      | p-value |
| HF rehospitalization | 0.131            | 0.034-0.503 | 0.003   |
| Cardiac death        | 0.259            | 0.047-1.415 | 0.119   |
| Composite outcome    | 0.162            | 0.053-0.492 | 0.001   |
| All-cause death      | 0.713            | 0.201-2.529 | 0.601   |

Adjusted and unadjusted HR for the study outcomes.  
Abstract 412 Figure.

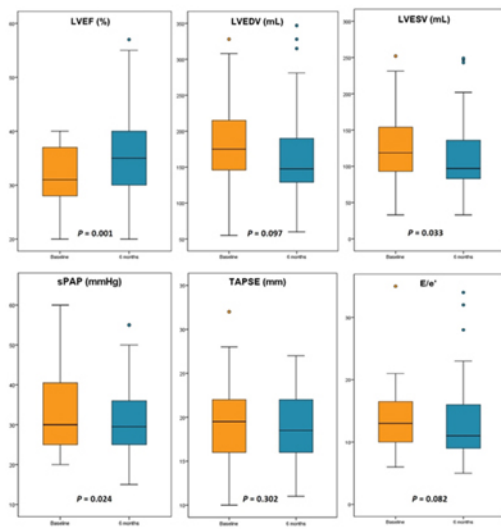

Source: http://academic.oup.com/ehjcimaging/article-pdf/21/Supplement_1/jez319.1183/31865263/jez319.1183.pdf
